# Supplementary material for: Replication and Oncolytic Activity of an Avian Orthoreovirus in Human Hepatocellular Carcinoma Cells
Source: MDPI journal article supplement (doi:10.3390/v9040090), 2017-04-24
Supplement: s1 [file s1]

# Replication and Oncolytic Activity of an Avian Orthoreovirus in Human Hepatocellular Carcinoma Cells

Robert A. Kozak, Larissa Hattin, Mia J. Biondi, Juan C. Corredor, Scott Walsh, Max Xue-Zhong, Justin Manuel, Ian D. McGilvray, Jason Morgenstern, Evan Lusty, Vera Cherepanov, Betty-Anne McBey, David Leishman, Jordan J. Feld, Byram Bridle and Éva Nagy

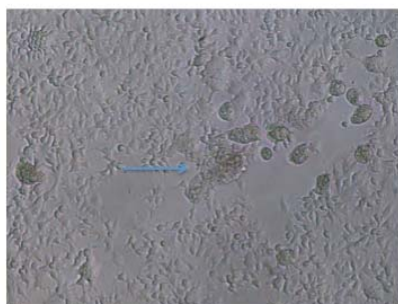

**Figure S1.** Cytopathic effect in response to viral infection. CH-SA9 chicken cells were infected at a MOI of 0.5 for 24 h. The arrow indicates the syncytia.

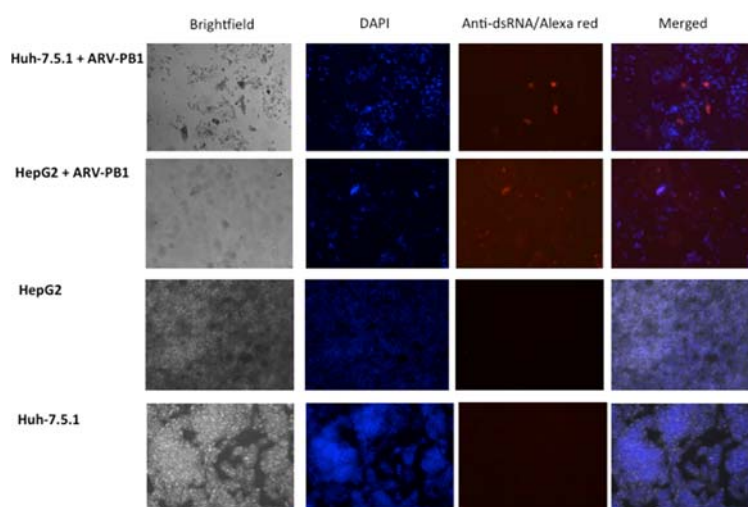

**Figure S2.** Presence of viral RNA in infected cells. Cells were infected with ARV-PB1 (MOI of 5) for 48 h and then were fixed with formalin, stained with DAPI and an anti-dsRNA monoclonal antibody, and analyzed by fluorescent and bright-field microscopy (100× magnification). No dsRNA was detected in uninfected cells.

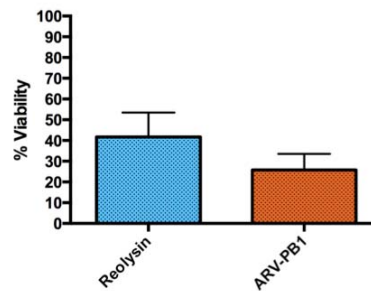

**Figure S3.** Comparison of ARV-PB1 to Reolysin™ in Huh-7.5 cells. Cells were infected with ARV-PB1 (MOI of 10) or Reolysin™ (MOI of 10) for 96 h. Viability was determined by PrestoBlue™ Cell Viability Reagent and data were normalized to uninfected controls. The experiment was performed in triplicate, mean was calculated, and error bars represent the standard error of the mean.

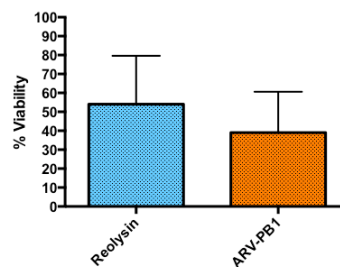

**Figure S4.** Comparison of ARV-PB1 to Reolysin™ in BB7 cells. Cells were infected with ARV-PB1 (MOI of 10) or Reolysin™ (MOI of 10) for 96 h. Viability was determined by PrestoBlue™ Cell Viability Reagent and data was normalized to uninfected controls. The experiment was performed in triplicate, mean was calculated, and error bars represent the standard error of the mean.

**Table S1.** Homology of ARV-PB1 nucleotide sequences.

| Segment | Homologue                                                          | % Pairwise identity |
|---------|--------------------------------------------------------------------|---------------------|
| S1      | Avian orthoreovirus clone 138<br>(Accession No.: AF218359)         | 90                  |
| S2      | Avian orthoreovirus strain GX110058<br>(Accession No.: KF741743.1) | 92                  |
| S4      | Avian orthoreovirus strain AVS-B<br>(Accession No.: FR694200)      | 94                  |
| M2      | Avian orthoreovirus clone 526<br>(Accession No.: KF741700)         | 94                  |

**Table S2.** Characteristics of cancer cell lines.

| Cells     | Origin | Tissue      | Disease                                                  |
|-----------|--------|-------------|----------------------------------------------------------|
| Huh-7     | Human  | Liver       | Hepatocellular carcinoma                                 |
| Huh-7.5   | Human  | Liver       | Hepatocellular carcinoma                                 |
| Huh-7.5.1 | Human  | Liver       | Hepatocellular carcinoma                                 |
| HepG2     | Human  | Liver       | Hepatocellular carcinoma                                 |
| DU-145    | Human  | Prostate    | Carcinoma                                                |
| PC-3      | Human  | Prostate    | Adenocarcinoma                                           |
| 22Rv1     | Human  | Prostate    | Carcinoma                                                |
| SKOV-3    | Human  | Ovary       | Adenocarcinoma                                           |
| HeLa      | Human  | Cervix      | Adenocarcinoma                                           |
| HCT 116   | Human  | Colon       | Colorectal carcinoma                                     |
| L1210     | Murine | Lymphoblast | Lymphocytic leukemia                                     |
| ID8       | Murine | Ovary       | Neoplasm-containing carcinoma and sarcomatous components |
| A549      | Human  | Lung        | Carcinoma                                                |

Table S3. Primers for qPCR.

| Gene   | Forward primer                   | Reverse primer                   |
|--------|----------------------------------|----------------------------------|
| GAPDH  | 5'-TGCACCACCAACTGCTTAGC-3'       | 5'-GGCATGGACTGTGGTCATGAG-3'      |
| USP18  | 5'-CAGACCCTGACAATCCACCT-3'       | 5'-AGTCATACTGCCCTCCAGA-3'        |
| RSAD2  | 5'-GTGGTTCCATTATGGTGAGTATTT-3'   | 5'-CCACGGCCAATAAGGACATT-3'       |
| Mx     | 5'-CAGCACCTGATGGCCTATCA-3'       | 5'-ACGTCTGGAGCATGAAGAAGT-3'      |
| ISG15  | 5'-GAG AGG CAG CGA ACT CAT CT-3' | 5'-CTT CAG CTC TGA CAC CGA CA-3' |
| IF144  | 5'-TGCTCTTTCTGACATCTCGGTGGT      | 5'-AGAAGTCATCTGCAGCCCATAGCA-3'   |
| STAT1  | 5'-CCATCCTTTGGTACAACATGC-3'      | 5'-TGCACATGGTGGAGTCAGG-3'        |
| IP10   | 5'-GTACGCTGTACCTGCATCAGCATT-3'   | 5'-GGATTCAGACATCTCTTCTCACCC-3'   |
| SOCS3  | 5'-GGCCACTCTTCAGCATCTC-3'        | 5'-ATCGTACTGGTCCAGGAAGT-3'       |
| IL-29  | 5'-CACAGGAGCTAGCGAGCTTCA-3'      | 5'-TTTTCAGCTTGAGTGACTCTTCCA-3'   |
| IL-28A | 5'-GACCCAGCCCTGGTGGAC-3'         | 5'-CTGGATACAGGCCCGGAA-3'         |
| IL-28B | 5'-GGCCTTTAAGAGGGCCAAAG-3'       | 5'-GGCGGGAGCGGCACT-3'            |
| IL-8   | 5'-TGCCAAGGAGTGCTAAAG-3'         | 5'-CTCCACAACCCTCTGCAC-3'         |

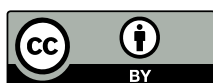

© 2017 by the authors. Licensee MDPI, Basel, Switzerland. This article is an open access article distributed under the terms and conditions of the Creative Commons Attribution (CC BY) license (<http://creativecommons.org/licenses/by/4.0/>).
